# Supplementary material for: Systematic Review and Meta-Analysis Confirms Significant Contribution of Surfactant Protein D in Chronic Obstructive Pulmonary Disease
Source: PubMed Central journal article supplement (PMC6479180; doi:10.3389/fgene.2019.00339), 2019-04-17
Supplement: Image_1.pdf [file Image_1.pdf]

## SUPPLEMENTARY FIGURES

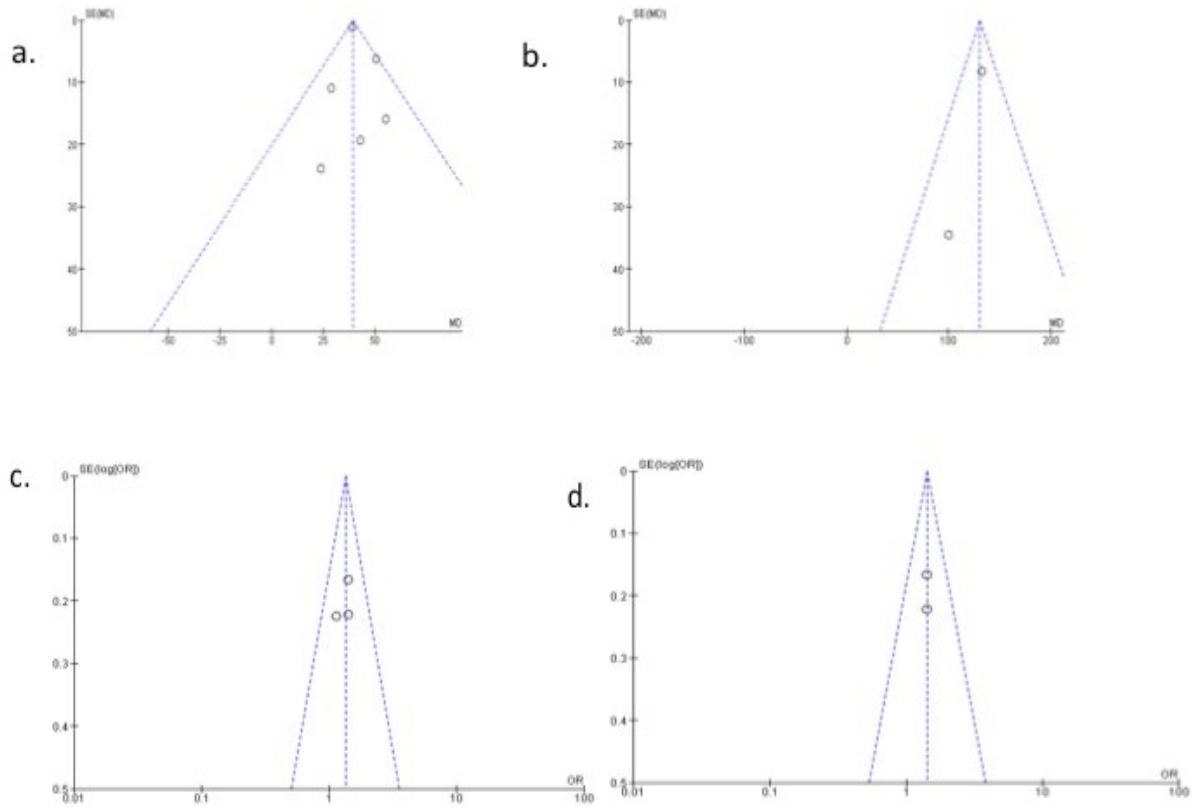

**Supplementary Figure 1:** Funnel plots were constructed to evaluate the publication bias in the study. (a.) Serum SFTPD level in overall COPD; (b.) Serum SFTPD level in AECOPD; (c.) rs721917 allelic association with overall COPD; (d.) rs721917 allelic association with AECOPD.
